# Prion Protein Paralog Doppel Protein Interacts with Alpha-2-Macroglobulin: A Plausible Mechanism for Doppel-Mediated Neurodegeneration

Stefano Benvegnù<sup>1</sup>, Diego Franciotta<sup>2</sup>, Josh Sussman<sup>3\*</sup>, Angela Bachi<sup>5</sup>, Elisabetta Zardini<sup>2</sup>, Paola Torrieri<sup>7</sup>, Cedric Govaerts<sup>3,6</sup>, Salvatore Pizzo<sup>8</sup>, Giuseppe Legname<sup>1,3,4\*</sup>

**1** Scuola Internazionale Superiore di Studi Avanzati - International School for Advanced Studies (SISSA-ISAS), Trieste, Italy, **2** IRCCS, Foundation, Neurological Institute C. Mondino, University of Pavia, Pavia, Italy, **3** Institute for Neurodegenerative Diseases, **4** Department of Neurology, University of California San Francisco, San Francisco, California, United States of America, **5** DIBIT, San Raffaele Scientific Institute, Milan, Italy, **6** Université Libre de Bruxelles, Bruxelles, Belgium, **7** National Centre for Rare Diseases, Istituto Superiore di Sanità, Roma, Italy, **8** Department of Pathology, Duke University Medical Center, Durham, North Carolina, United States of America

## Abstract

Doppel protein (Dpl) is a paralog of the cellular form of the prion protein (PrP<sup>C</sup>), together sharing common structural and biochemical properties. Unlike PrP<sup>C</sup>, which is abundantly expressed throughout the central nervous system (CNS), Dpl protein expression is not detectable in the CNS. Interestingly, its ectopic expression in the brain elicits neurodegeneration in transgenic mice. Here, by combining native isoelectric focusing plus non-denaturing polyacrylamide gel electrophoresis and mass spectrometry analysis, we identified two Dpl binding partners: rat alpha-1-inhibitor-3 ( $\alpha_{13}$ ) and, by sequence homology, alpha-2-macroglobulin ( $\alpha_2M$ ), two known plasma metalloproteinase inhibitors. Biochemical investigations excluded the direct interaction of PrP<sup>C</sup> with either  $\alpha_{13}$  or  $\alpha_2M$ . Nevertheless, enzyme-linked immunosorbent assays and surface plasmon resonance experiments revealed a high affinity binding occurring between PrP<sup>C</sup> and Dpl. In light of these findings, we suggest a mechanism for Dpl-induced neurodegeneration in mice expressing Dpl ectopically in the brain, linked to a withdrawal of natural inhibitors of metalloproteinase such as  $\alpha_2M$ . Interestingly,  $\alpha_2M$  has been proven to be a susceptibility factor in Alzheimer's disease, and as our findings imply, it may also play a relevant role in other neurodegenerative disorders, including prion diseases.

**Citation:** Benvegnù S, Franciotta D, Sussman J, Bachi A, Zardini E, et al. (2009) Prion Protein Paralog Doppel Protein Interacts with Alpha-2-Macroglobulin: A Plausible Mechanism for Doppel-Mediated Neurodegeneration. PLoS ONE 4(6): e5968. doi:10.1371/journal.pone.0005968

**Editor:** Petri Kursula, University of Oulu, Finland

**Received:** December 31, 2008; **Accepted:** May 8, 2009; **Published:** June 18, 2009

**Copyright:** © 2009 Benvegnù et al. This is an open-access article distributed under the terms of the Creative Commons Attribution License, which permits unrestricted use, distribution, and reproduction in any medium, provided the original author and source are credited.

**Funding:** This work was supported by grant HL-24066 from the National Heart, Lung, and Blood Institute to SP, by grant from Italian Institute of Technology - SISSA Unit to SB and GL. The funders had no role in study design, data collection and analysis, decision to publish, or preparation of the manuscript.

**Competing Interests:** The authors have declared that no competing interests exist.

\* E-mail: legname@sissa.it

‡ Current address: ImClone Systems Incorporated, New York, New York, United States of America

## Introduction

Prion diseases, generally known as transmissible spongiform encephalopathies or TSE, are fatal neurodegenerative disorders due to the conversion of the cellular form of the prion protein (PrP<sup>C</sup>) into an abnormal, pathogenic and proteinase-resistant form of the same protein (PrP<sup>Sc</sup>). The family of prion diseases comprises Creutzfeldt-Jakob disease (acronym CJD), fatal familial insomnia (acronym FFI), and kuru in humans, chronic wasting disease (acronym CWD), bovine spongiform encephalopathy (acronym BSE), and scrapie in deer, cows and sheep, respectively. Once PrP<sup>C</sup> is converted into its pathogenic isoform, PrP<sup>Sc</sup>, it accumulates in the brain, and its presence and accumulation is linked to neurodegeneration in affected patients and animals [1,2].

In recent years, doppel protein (Dpl), a PrP<sup>C</sup> paralog, has been identified as a protein sharing common biochemical and structural properties with the latter [3,4,5]. Dpl and the C-terminal domain of PrP<sup>C</sup> have only approximately 25% of primary aminoacidic sequence identity (Figure 1C), yet their tertiary structure is very similar (Figure 1B), and both share the same secondary structure elements consisting of a three  $\alpha$ -helix bundle with two short

$\beta$ -strands (Figure 1A) [5]. Like PrP<sup>C</sup>, Dpl has two N-glycosylation sites, and a highly enriched basic aminoacids flexible amino-terminal region which likely contributes to its cellular trafficking (Figure 1A). However, in contrast to PrP<sup>C</sup>, Dpl is expressed at very low levels in the mouse central nervous system (CNS), whereas its expression is high in non-nervous tissues, e.g. testes. Notably, two transgenic (tg) mouse (Mo) lines ablated for the PrP gene develop late-onset ataxia as well as Purkinje cells and granule cells degeneration in the cerebellum [6,7]. In these tg lines, Dpl is ectopically upregulated in the CNS. In contrast, other PrP-knockout murine lines, in which Dpl ectopic expression in the CNS is absent, do not develop either ataxia or neurodegeneration. Furthermore, Dpl levels in the CNS proved to be inversely correlated to the onset age of ataxic phenotype [8]. Interestingly, tg mice expressing PrP with amino-proximal deletions (named PrP $\Delta$ F) show ataxia and degeneration of the cerebellar granule cell layer within a few weeks after birth [9]. PrP $\Delta$ F mutants lack regions absent also in Dpl, therefore sharing structural properties with the latter. Restoration of wild type PrP presence in the CNS of mice expressing either Dpl [8] or PrP $\Delta$ F [9] rescues the ataxic phenotype. These findings suggest that Dpl expression may lead to

neurodegeneration similar to truncated PrP, and that the wild type PrP<sup>C</sup> and Dpl may have opposite and antagonistic functions. In fact, cell surface PrP<sup>C</sup> may have a protective role and antagonize the toxic effect of Dpl in the CNS, either by interacting directly with Dpl, or *via* another protein, or *via* non competitive mechanisms [10]. Indeed, a neuroprotective function for PrP<sup>C</sup> has been proposed [11,12,13].

In order to investigate the possibility that PrP<sup>C</sup> and Dpl may have common binding partner(s), we previously described novel constructs of PrP<sup>C</sup> and Dpl fused to the Fc region of human IgG1, and used these fusion proteins as probes to stain sections of mouse brain

[14]. We found restricted binding of both these fusion proteins to the granule cell layer (GCL) of the cerebellum, indicating the presence of ligands in this region that specifically bind to either PrP<sup>C</sup> or Dpl. These findings prompt us to explore several biochemical routes to identify physiological interacting molecules of PrP<sup>C</sup> and Dpl in the cerebellum. However, while many physiological and putative PrP interacting partners have been described (reviewed in [15]), very little is known about Dpl-interacting proteins. We therefore focused on the identification of Dpl binding proteins.

We utilized native isoelectric focusing (IEF) plus non-denaturing polyacrylamide gel electrophoresis of rat cerebellum slices to

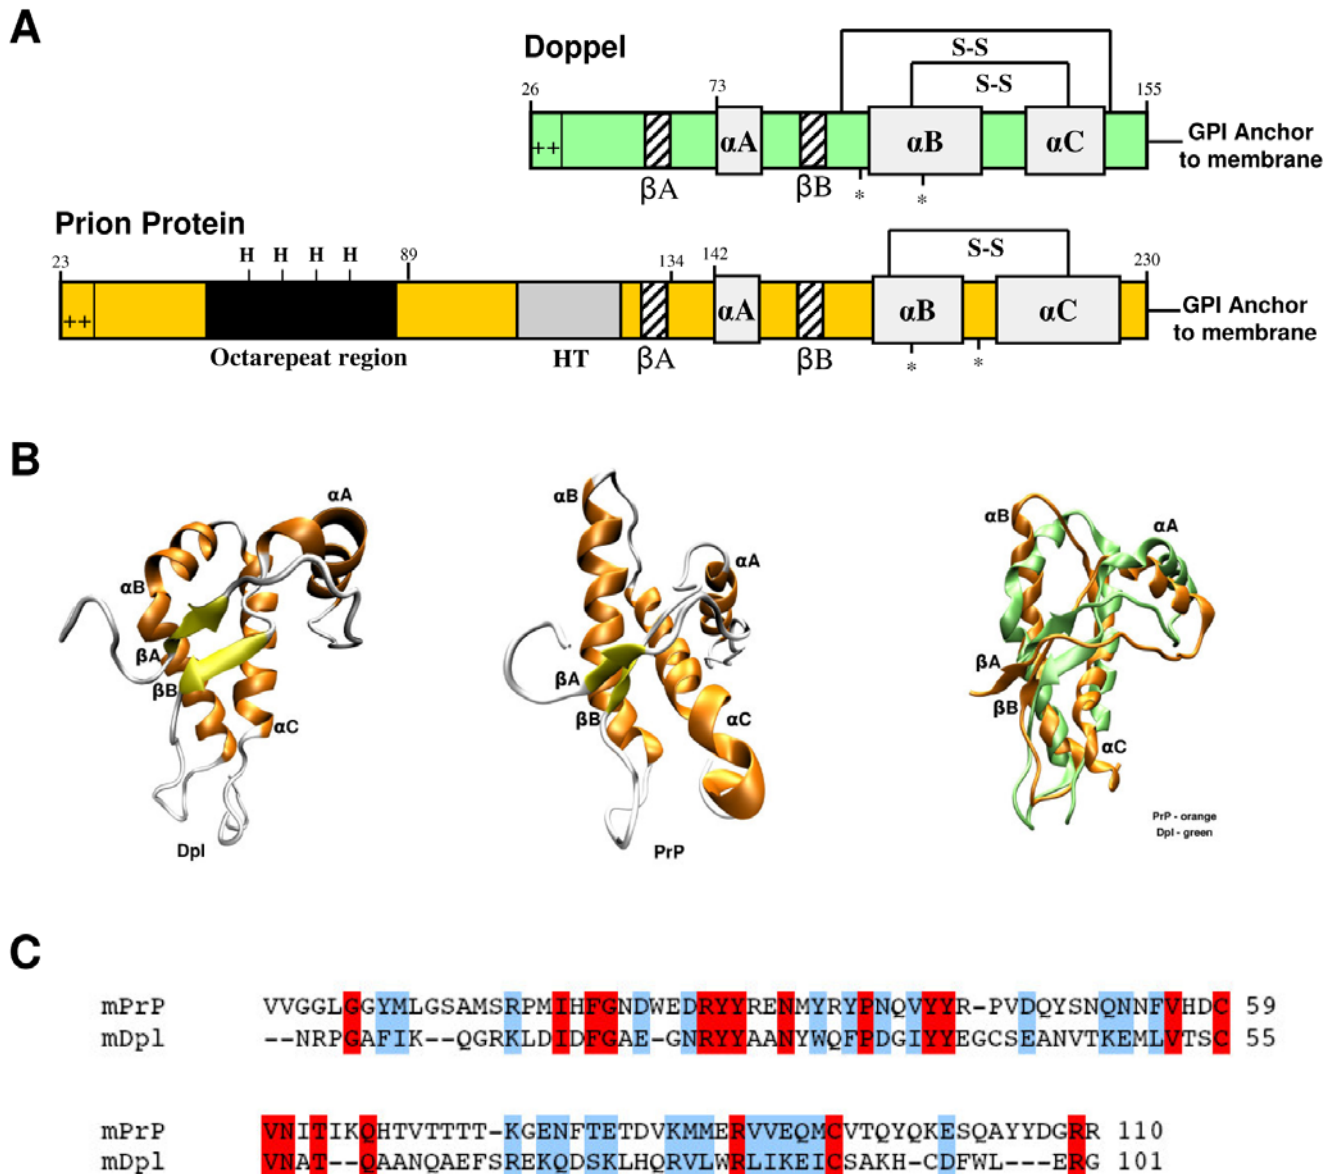

**Figure 1. Mature PrP and Dpl protein share common structural architectures.** (A) PrP<sup>C</sup> and Dpl have common secondary structure elements, composed by three alpha helices ( $\alpha A$ ,  $\alpha B$  and  $\alpha C$ ) and two beta strands ( $\beta A$  and  $\beta B$ ). Both PrP<sup>C</sup> and Dpl have N-glycosylation sites (\*), disulfide bridges (S-S) and a GPI-moiety, which links the proteins to the extracellular side of the cellular membrane. PrP<sup>C</sup> and Dpl also share a positively charged N-terminus. PrP<sup>C</sup> contains five octapeptide repeats capable of binding copper through histidine residues (modified from [52]). (B) The topology of Dpl (PDB code: 1I17, left structure) is very similar to that of PrP<sup>C</sup> (PDB code: 1AG2, central structure). A significant difference is that  $\alpha B$  helix of Dpl (in green, right image) is bent and that the two beta strands are oriented differently than those in the PrP<sup>C</sup> (in orange, right image). (C) Sequence alignment between mouse PrP<sup>C</sup> (mPrP, residues Val<sup>120</sup>-Arg<sup>229</sup>; SwissProt entry: P04925) and mouse Dpl (mDpl, residues Asn<sup>55</sup>-Gly<sup>155</sup>; SwissProt entry: Q9QUG3) proteins. In this tract the two proteins share 18% of sequence identity and 44% of sequence similarity. Fully conserved residues are highlighted in red, while semi-conserved are shown in blue. doi:10.1371/journal.pone.0005968.g001

extract and isolate the protein ligands of Dpl. These techniques proved to be essential in our quest because they ensured that the isolated proteins retained their native folding. By mass spectrometry (MS) analysis, we demonstrated unequivocally that rat alpha-1-inhibitor-3 ( $\alpha_1I_3$ ) is a major ligand for Dpl in the brain. Rat  $\alpha_1I_3$  is a member of the alpha-macroglobulin superfamily, which contains both proteinases inhibitors and complement molecules [16]. By homology search, we also identified mouse and human alpha-2-macroglobulin ( $\alpha_2M$ ) as Dpl interacting molecules. Interestingly, PrP<sup>C</sup> was not found to interact to any alpha-2-macroglobulins, suggesting that this class of proteins may not be shared ligands for both PrP<sup>C</sup> and Dpl. Finally, in this study we also demonstrate a strong interaction between PrP and Dpl, indicating an intriguing plausible molecular mechanism for their biological antagonism.

## Materials and Methods

### Animals

Animal husbandry was performed in compliance with the European laws [European Community Council Directive, November 24, 1986 (86/609/EEC)], and in accordance to the guidelines of the San Raffaele Hospital Institutional Animal Care and Use Committee.

### Proteins

Apo-transferrin, mouse albumin, aprotinin and alpha-chymotrypsin were purchased from Sigma-Aldrich (St. Louis, MO, USA).

### Recombinant mouse PrP and Mouse Dpl production and purification

The production and purification of recombinant proteins are described in Text S1.

### Cloning and production of MoPrP-Fc and MoDpl-Fc fusion proteins

MoPrP-Fc and MoDpl-Fc were produced as previously described [14].

### Extraction and identification of the protein from cerebellar tissue with non-denaturing separation techniques

**Analytical IEF.** The technique for direct tissue isoelectric focusing (IEF) has been previously described elsewhere [17]. For brain tissue IEF, cerebella from Sprague-Dawley rats were taken, immediately frozen in an isopentane-filled tube cooled in liquid nitrogen, and stored at  $-80^{\circ}\text{C}$  until use. Sections of 30  $\mu\text{m}$  thickness were cut on a cryostat microtome and, still frozen, applied onto the hydrophilic side of a  $1.0 \times 10.0$  cm plastic support (GelBond, FMC, Rockland, ME, USA) (Figure 2B-1 and Figure 2B-2). The support was immediately placed upside down onto an agarose gel plate for IEF (pH range, 3.0–10.0, Cambrex, Rockland, ME, USA; IEF apparatus: Resolve Omega, Isolab Inc., Akron, OH, USA) and located both centrally and near the cathode. A pH marker (IEF Standards, Bio-Rad, Hercules, CA, USA) was electrophoresed at the two lateral sides of the plastic support. Focusing was at 12 W, constant power, to a maximum of 700 V for 2 h at  $9^{\circ}\text{C}$ . The plastic support and tissue sections were removed after 30 min. At the end of the run, the gel was cut to obtain a large central part, which was used for the preparative procedure, and two small lateral parts, which included the two lanes with pH marker, and the adjacent, 0.8 cm wide lanes where the proteins had run. The lanes with pH marker were silver

stained [18]. The adjacent lanes were blotted onto nitrocellulose [19]. Briefly, a sheet of nitrocellulose paper (Schleicher & Schuller, Keene, NH, USA) was laid onto the gel, and covered with a PBS-wetted sheet of fine filter paper, 8 sheets of absorbent paper, a glass plate, and a weight of 0.5 kg for 1 h. Each of the following steps was performed at  $4^{\circ}\text{C}$ , with gentle agitation, and alternated by washing with PBS. The nitrocellulose was saturated in 10% bovine serum albumin in PBS for 1 h. Incubated first with non-diluted medium containing MoDpl-Fc (6 mL) overnight, then with a biotinylated anti-human Fc antibody (Dako, Glostrup, Denmark) at a dilution of 1:500 in 2% bovine serum albumin in PBS for 1 h. The treated nitrocellulose was developed with avidin-biotin (Vectastain ABC kit, Vector, Burlingame, CA, USA) and stained with 0.5 mg/mL of diaminobenzidine in PBS and 0.02% of  $\text{H}_2\text{O}_2$  up to visualize the band. The reaction was stopped with PBS.

**Preparative IEF.** The central part of the gel was used for protein recovery (Figure 2B-2). Analytical IEF indicated the position where the protein migrated in the gel (isoelectric point, pI). To be sure of including the desired protein, an horizontal piece of the gel, spanning 2 mm above and below protein's migration point, was removed from the support, and put into a conical minitube in PBS (200  $\mu\text{L}$ ). After an overnight shaking at  $4^{\circ}\text{C}$ , the minitube was centrifuged at  $7,000 \times g$  for 1 min. The liquid, which contained the protein recognised by MoDpl-Fc, was recovered ( $\sim 100$   $\mu\text{L}$ ), and concentrated ( $2 \times$ ) with a vacuum desiccator. In the sample, the searched protein was mixed with other proteins with similar, or slightly different pI. To obtain one single-band protein, which was concentrated and suitable for mass spectrometric (MS) identification, the sample was split into two aliquots of 25  $\mu\text{L}$  and run in electrophoresis on a non-denaturing polyacrylamide gradient gel (4–15% acrylamide; Mini-Protean II; Bio-Rad, Hercules, CA, USA) at 100 V for 3 h. One lane of the gel was electrically blotted onto nitrocellulose paper (Mini Trans-blot chamber, Bio-Rad, Hercules, CA, USA) in Tris/glycine buffer at 200 mA for 3 h at  $4^{\circ}\text{C}$ . The nitrocellulose was then treated as previously described after analytical IEF to confirm binding specificity, and estimate the point of the protein migration. This point was used to identify the protein in the second lane, which was silver stained with a protocol suitable for MS sequencing [20] (Figure 2C).

### Protein identification by MALDI-TOF MS analysis

Gel bands were manually excised, reduced, alkylated and digested overnight with bovine trypsin (Roche, Basel, Switzerland) as described elsewhere [20]. One  $\mu\text{L}$  aliquots of the supernatant were used for MS analysis on a MALDI-TOF Voyager-DE STR (Applied Biosystems) mass spectrometer. Spectra were accumulated over a mass range of 750–4,000 Dalton (Da) with a mean resolution of about 15,000. Spectra were internally calibrated using trypsin autolysis products and processed *via* Data Explorer software version 4.0.0.0 (Applied Biosystems). Alkylation of cysteine by carbamidomethylation, and oxidation of methionine were considered as fixed and variable modifications respectively. Two missed cleavages per peptide were allowed, and a mass tolerance of 50 ppm was used. Peptides with masses correspondent to those of trypsin and matrix were excluded from the peak list. Proteins were identified by searching against a comprehensive non redundant protein database (NCBIInr 20090222; Taxonomy: Rodentia) using MASCOT algorithm [21].

### Homology search

Initial sequence similarity searches were performed with BLAST [22] using the  $\alpha_1I_3$  sequence as probe. All significant hits returned are part of the proteinase-binding  $\alpha$ -macroglobulins

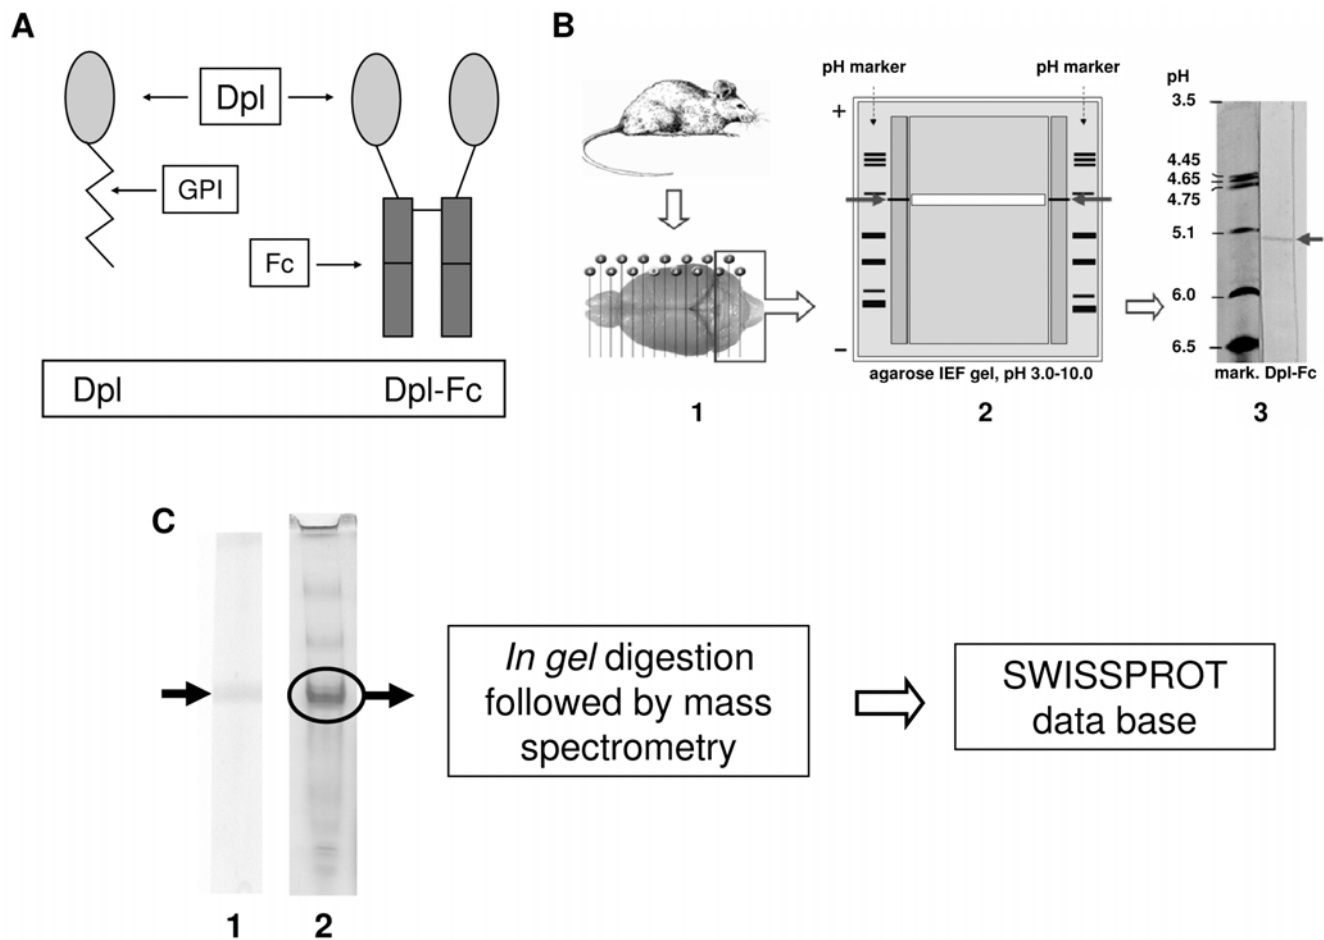

**Figure 2. Identification of Dpl interacting protein in rat cerebellar slices.** (A) Schematic representation of Dpl-Fc construct. Dpl protein is fused with the Fc region of a human immunoglobulin IgG1. The resulting fusion protein is denominated Dpl-Fc. (B) Direct tissue isoelectric focusing of solid tissues technique. This method allows the extraction of more numerous protein vs extracts of tissue homogenates [17]. The technique also prevents the loss of conformational epitopes, which are denatured by standard extraction procedures. Cryostatic rat cerebellar slices (B-1) were put onto the gel. After IEF run, two lateral parts of the gel were blotted onto nitrocellulose stripes, and tested with MoDpl-Fc, for the identification of the binding protein (B-2). Arrows indicate the band (B-2 and B-3). Identification of the band's approximate pI, deduced by comparison with the pH marker, was 5.3. The central part of the gel was used for the protein recovery: a strip of the agarose gel (in white, B-2), which comprised the band (arrows), was excised and placed inside a microtube in PBS. After incubation and centrifugation, the sample was run on native gradient PAGE (C). (C) Gel electrophoresis of recovered protein. To yield amounts of the protein of interest suitable for proteomics, the sample obtained by isoelectric focusing analysis was split into two aliquots and run on PAGE. One aliquot was transferred onto nitrocellulose paper and tested with MoDpl-Fc to identify the protein of interest (C-1), the other one was silver stained (C-2). The arrow indicates the protein that binds to MoDpl-Fc, which was eventually recognized to be rat  $\alpha_1I_3$  precursor.  
doi:10.1371/journal.pone.0005968.g002

family. Sequence alignments were performed using ClustalW [23] on a non-redundant set of the mammalian sequences from this protein family. A similarity tree was generated using TreeView [24].

#### Preparation of $\alpha_1I_3$ and $\alpha_2M$

The protein  $\alpha_2M$  was purified to apparent homogeneity by  $Zn^{2+}$ -chelate chromatography, as previously described [25], with minor modifications [26].

Rat  $\alpha_1I_3$  was purified to apparent homogeneity, as previously described [26].

#### Enzyme-Linked ImmunoSorbent Assay (ELISA)

A general ELISA protocol was used with  $\alpha_1I_3$ ,  $\alpha_2M$ , MoDpl, MoPrP, MoPrP-Fc, apo-transferrin, mouse albumin, aprotinin and alpha-chymotrypsin. In detail, 96 well ELISA plates (Dynex Corporation, Chantilly, VA, USA) coated with the various

proteins were used in biochemical assays for verification of protein:protein interaction. A conventional ELISA procedure was used with a slight modification [27]. For each well, stated amount of protein was diluted in 100  $\mu$ L of 0.1 M sodium bicarbonate solution, pH 8.6 and incubated overnight at 4°C. After nine washes with 1×TBST, the well was blocked using saturating solution [0.25% BSA, 0.05% Tween-20 in Dulbecco's PBS  $Ca^{++}$   $Mg^{++}$  Free (Gibco, Invitrogen, Carlsbad, CA, USA)] for 1 h at room temperature (RT). The addition of proteins to the wells was preceded by a pre-incubation in saturating solution at 4°C for 1 h. All incubations for protein binding were performed at RT after this step. In general, indicated amounts of PrP were diluted in saturating solution and incubated for 2 h. Nine repeated washes between incubations were performed with 1×TBST. For PrP detection, either 2  $\mu$ g/mL of humanized anti-MoPrP HuM-D18 antibody fragments Fab [28] or a 1:500 dilution of a rabbit polyclonal anti-MoPrP R073 [29] was added and incubated for

1 h at RT. For Dpl detection, a 1:1,000 dilution of a rabbit polyclonal anti-MoDpl was added and incubated for 1 h at RT [8]. A 1 h incubation with 100  $\mu$ L of goat anti-human Fc (1:1,000 dilution) conjugated to alkaline phosphatase (Pierce, Rockford, IL, USA) or 100  $\mu$ L of an anti-rabbit IgG-Alkaline Phosphatase 1:5,000 (Promega Corporation, Madison, WI, USA) were added for 1 h at RT. MoPrP-Fc was detected using a goat polyclonal anti-human Fc antibody at 1:1,000 ratio and incubated for 1 h at RT.

### Surface Plasmon Resonance

Surface Plasmon Resonance (SPR) analysis was performed at 20°C using the Biacore 2000 biosensor system (Biacore AB, Uppsala, Sweden). For surface preparation, recDpl was immobilized on a carboxymethyl dextran (CM5; Biacore AB) sensor chip using standard amine-coupling chemistry. EDC (N-ethyl-N'-[3-(dimethylamino)propyl] carbodiimide) and NHS (N-hydroxysuccinimide) were used for surface activation and ligand coupling; ethanolamine was used for deactivation. For kinetic analysis, duplicate injections of analytes [recMoPrP(89–230) and recMoPrP(23–230)] in various concentrations (0.44–4.4  $\mu$ M) were run under the buffer condition of HBS-N (10 mM HEPES, 150 mM NaCl), pH 7.4 (Biacore AB). Analytes were injected over the Dpl-coupled and uncoupled surfaces in a CM5 sensor chip at a flow rate of 20  $\mu$ L/min for 2 min. Dissociation was monitored for 5 min. SPR from the uncoupled surface was used as a reference. As many as four independent serial dilutions were carried out for each binding experiment. The obtained kinetic data were analyzed by BIAevaluation software (Biacore AB).

### Statistical analyses

Results are given as mean  $\pm$  SD. Statistical analyses were performed by using Student's *t* test (two-tailed), and the null hypothesis was rejected at the 0.05 level.

## Results

### MoPrP(23–230) and MoDpl(26–155) expression and purification in *E. coli*

The production of pure and natively folded of either recMoPrP(23–230) or recMoDpl(26–155) has been described in [30] and [8], respectively.

### MoPrP-Fc and MoDpl-Fc expression in the N2a cell line

MoPrP(23–231) and MoDpl(26–155) sequences were inserted into an expression plasmid containing the Fc region of human IgG1 to produce the MoPrP-Fc and MoDpl-Fc constructs, respectively.

The resulting plasmids were transfected independently in the mouse neuroblastoma N2a cell line and the proteins were expressed and secreted in the supernatant. Both MoPrP-Fc and MoDpl-Fc were expressed at comparable levels as dimers as detected by Western blot (data not shown), and used at concentration of 20  $\mu$ g/mL. The dimerization is conferred by the Fc portion and neither by MoPrP nor MoDpl. A control Fc protein was also expressed and successfully secreted in the supernatant of N2a cells (data not shown). Further characterization of these constructs has been described in detail elsewhere [14]. A schematic representation of Dpl-Fc construct is shown in Figure 2A.

### IEF of brain proteins and identification of $\alpha_1I_3$ as Dpl-interacting partner

After identifying the presence of MoDpl-Fc binders in the GCL of the cerebellum of mice [14], we attempted to purify the specific

protein, or proteins, responsible for such positive reactivity. To this purpose we employed rat cerebella. After extraction and separation of native rat cerebellar proteins with IEF, we transferred the protein to nitrocellulose support paper and used MoDpl-Fc as probe. MoDpl-Fc proved to bind a sharp band at pH 5.3 (Figure 2B-3). Subsequent preparative procedures (see Materials and Methods) allowed us to obtain amounts of the detected protein suitable for mass spectrometry analysis, which identified the band as rat  $\alpha_1I_3$  (Figure 2C and Figure S1) (gi/83816939, 29 matched peptides out of 39, sequence coverage 26%, Score: 231 Expect: 1.8e-018).

### Identification of $\alpha_2M$ by homology search

As  $\alpha_1I_3$  is a monomeric protein member of the alpha-macroglobulin superfamily [31], we investigated the possibility that Dpl could also interact with other members of the macroglobulins family whose expression is not restricted to rat. To assess this hypothesis, we performed a sequence homology search analysis and identified also mouse and human  $\alpha_2M$  as potential interacting partners of Dpl. Figure 3 shows a similarity tree representing a multiple sequence alignment of a non-redundant set of the mammalian sequences from the proteinase-binding  $\alpha$ -macroglobulins family of proteins, which are large glycoproteins found on the plasma of vertebrates that can inhibit proteinases from all catalytic classes by a molecular trapping mechanism [32]. They contain a conserved thiolester motif that allows rapid classification. In addition to the proteinase inhibitors, the family also contains the complement components C3, C4 and C5.

As shown in Figure 3, the members of the family showing the strongest similarity to  $\alpha_1I_3$  are the  $\alpha_2M$  proteins, which prompted experimental testing of such proteins as potential Dpl interacting partners (see below).

### ELISA validation of Dpl binding to $\alpha_1I_3$

Dpl binding to  $\alpha_1I_3$  was investigated by ELISA. The assay was performed using microtiter plates coated either with native (NATIVE) or with methylamine-activated (FAST) form of  $\alpha_1I_3$ , and then incubated with the supernatant of respectively untransfected, mock-transfected, and either MoPrP-Fc or MoDpl-Fc transfected N2a cells. The results of this assay show a significant binding signal for  $\alpha_1I_3$  by the conditioned medium of Dpl-Fc transfected N2a cells (Figure 4).

Indeed, the 'FAST', activated form of  $\alpha_1I_3$  achieved a greater binding signal to Dpl-Fc if compared to the signal obtained using 'NATIVE'  $\alpha_1I_3$ .

On the contrary, a much weaker signal was detected for  $\alpha_1I_3$  incubated with the supernatant of PrP-Fc transfected cells, being the former either in the native or in the activated form. Thus, binding of  $\alpha_1I_3$  to PrP seems unlikely.

### Confirmatory ELISA for $\alpha_2M$

After the identification of rat  $\alpha_1I_3$  by IEF and MS (see previous sections), *via* bioinformatic analysis we also identified mouse and human  $\alpha_2M$  as a potential Dpl-interacting partner. In order to experimentally validate this hypothesis,  $\alpha_1I_3$  and  $\alpha_2M$  were coated onto microtiter plates and subjected to ELISA, both in their 'NATIVE' form and in their activated form, and then incubated with recDpl (see Materials and Methods).

As expected, the binding signal of  $\alpha_2M$  to recDpl was comparable and generally equivalent to the one of  $\alpha_1I_3$ . No statistically different binding signals were achieved both by the native and the activated forms of  $\alpha_1I_3$  and  $\alpha_2M$  (Figure 5). This result seems contradictory with the results previously discussed, in

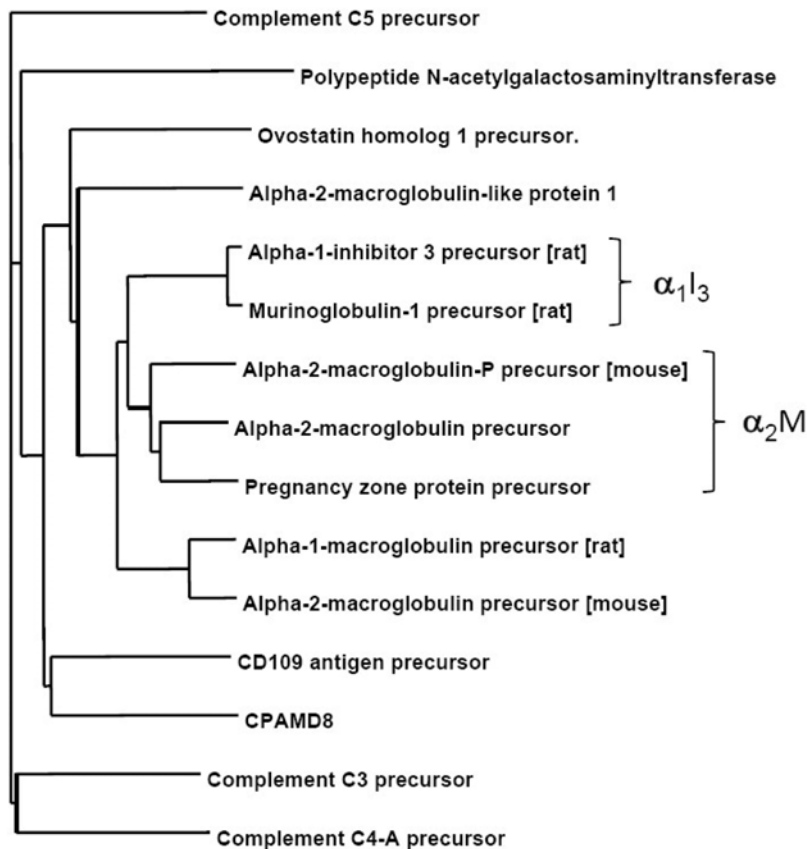

**Figure 3. Similarity tree of a non-redundant set of the mammalian members of the  $\alpha_2M$  type of proteinase inhibitors.** Except where noted, the human sequences were taken for alignment purposes. The  $\alpha_2M$  and rat  $\alpha_1I_3$  families are respectively highlighted by right braces. doi:10.1371/journal.pone.0005968.g003

which native and activated forms show different binding capability, but this variation may be due to the differences between the monomeric, unglycosylated, prokaryotic-produced recDpl and the dimeric, glycosylated, eukaryotic-produced Dpl-Fc.

In addition, several proteins such as apo-transferrin, mouse albumin, aprotinin and alpha-chymotrypsin were tested in ELISA in order to validate the specificity of recDpl interaction with  $\alpha_2M$ . In three independent experiments, no detectable recDpl binding to either apo-transferrin, or mouse albumin, or aprotinin or alpha-chymotrypsin was found (data not shown).

### Saturation of binding of $\alpha_2M$ by Dpl

In order to verify that the binding of  $\alpha_2M$  to Dpl was saturable, we carried out a titration by means of ELISA. As shown in Figure 6, the binding of Dpl (1.0  $\mu\text{g}/\text{well}$ ) can be saturated applying increased concentrations of both native and activated  $\alpha_2M$  (working range from 25  $\text{ng}/\text{well}$  to 1.6  $\mu\text{g}/\text{well}$ ).

### Measuring Dpl and PrP interaction

Although the molecular events underlying PrP-mediated rescue of Dpl neurotoxicity are not well understood, one model suggested for this interaction is the binding of PrP to Dpl. We performed ELISA experiments to determine whether recPrP and recDpl bind to each other. Indeed, recDpl bound to immobilized recPrP(23–230) in a direct ELISA, detected using a rabbit polyclonal antibody to Dpl (Figure 7A). Both recPrP(23–230) and recPrP(89–230) bound to immobilized recDpl, as detected by a rabbit polyclonal antibody to PrP (Figure 7B and Figure 7C). Full-length

recPrP(23–230) showed a greater binding capacity to Dpl compared to recPrP(89–230), which lacks the octapeptide repeat region. Moreover, a dimeric form of PrP expressed in N2a cells, PrP-Fc [14], also bound to Dpl as effectively as monomeric, full-length recPrP(23–230) (Figure 7D).

To understand the binding between Dpl and PrP molecules further, we analyzed the kinetics of binding between these proteins using Surface Plasmon Resonance (SPR) biosensor technology. The binding data were analyzed by a mathematical calculation based on the 1:1 (Langmuir) binding model (Table 1). This simulation perfectly matched with our experimental data, which demonstrated a 1:1 interaction between Dpl and both PrP(23–230) and PrP(89–230). Similar to results revealed by the previously performed ELISA, the binding capability of Dpl was greater with full-length recPrP(23–230) than with recPrP(89–230) (Figure 8). The  $K_D$  of Dpl-PrP binding was  $\sim 10$  times smaller with full-length PrP than with MoPrP(89–230) (Table 1). As suggested by  $k_{on}$  and  $k_{off}$  constants of each binding, this was mainly due to the faster association rate of recPrP(23–230) to Dpl compared to that of recPrP(89–230); the dissociation rates did not differ greatly (Figure 8 and Table 1).

### Discussion

A major physiological function for PrP<sup>C</sup> is still elusive and it is becoming increasingly clear that PrP<sup>C</sup> may play a pleiotropic role in a variety of cellular functions. Studies have been conducted on several strains of mice devoid of PrP<sup>C</sup>, but these animal models have not been able to clarify PrP<sup>C</sup> actual functions. In fact, in

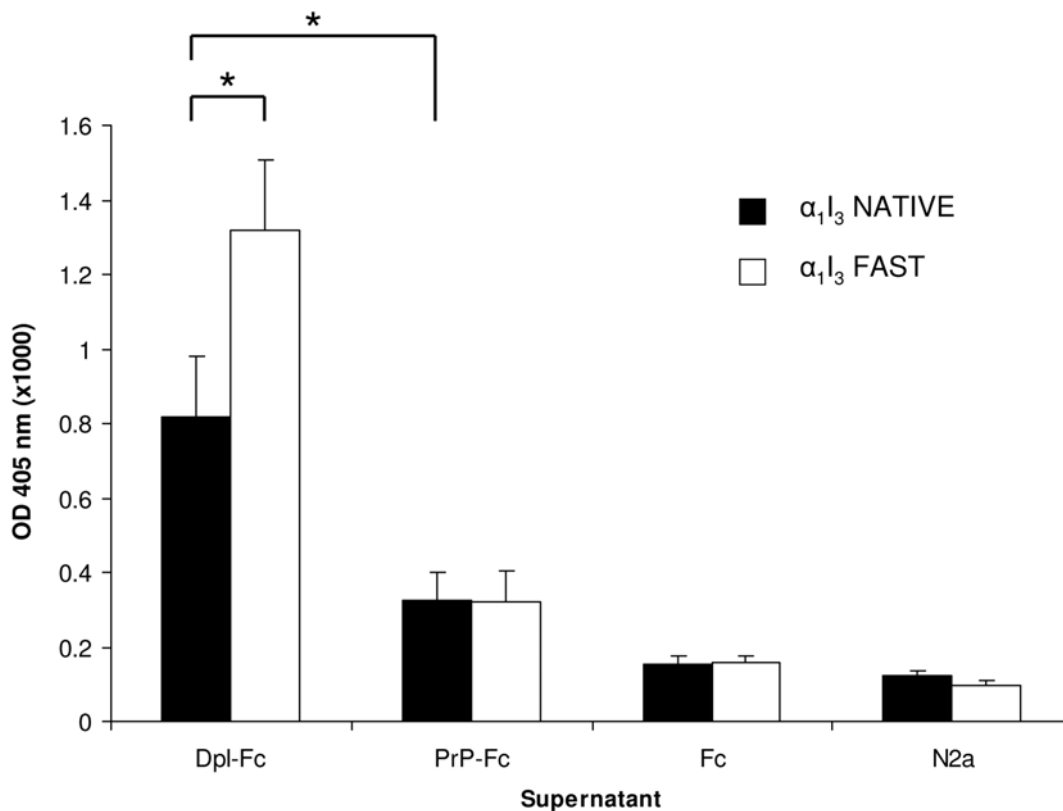

**Figure 4. Dpl binds to  $\alpha_1I_3$ .** ELISA plates coated with  $\alpha_1I_3$  in its native (black bars) or activated, fast (white bars) forms were incubated with the supernatant of respectively MoDpl-Fc transfected N2a cells (Dpl-Fc), MoPrP-Fc transfected N2a cells (PrP-Fc), mock-transfected N2a cells (Fc) and non-transfected N2a cells (N2a). \*,  $p < 0.05$ . Data shown are representative of at least three independent experiments. doi:10.1371/journal.pone.0005968.g004

certain PrP-knockout mouse strains the PrP<sup>C</sup> paralog Dpl was identified and emerged as a protein whose brain expression may alter CNS functions. Indeed, neurodegeneration of Purkinje and granule cells of the cerebellum occurs when Dpl is ectopically expressed in the brain [3]. The level of expression of Dpl in the brain is inversely correlated to the age at which Purkinje and

granule cells degeneration, as well as ataxic signs, start to be observed. The concomitant expression of full-length PrP and Dpl in tg mice is able to counteract the Dpl-induced ataxic phenotype, suggesting that the expression of PrP can neutralize the toxic effect of Dpl either by interacting directly with Dpl or through another protein [8]. Hence, we endeavored to search for Dpl interacting

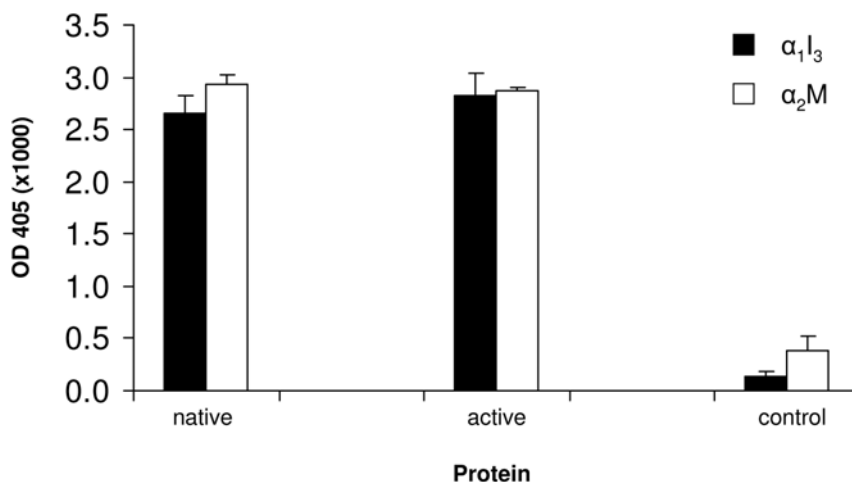

**Figure 5. ELISA binding measurements of recDpl with  $\alpha_2M$  and  $\alpha_1I_3$ .** Equimolar amounts of  $\alpha_2M$  and  $\alpha_1I_3$  were coated onto ELISA plates both in their native and in their active form, and then incubated with recDpl. Primary antibody was used as control: black bars,  $\alpha_1I_3$ ; white bars,  $\alpha_2M$ . Data shown are representative of at least three independent experiments. doi:10.1371/journal.pone.0005968.g005

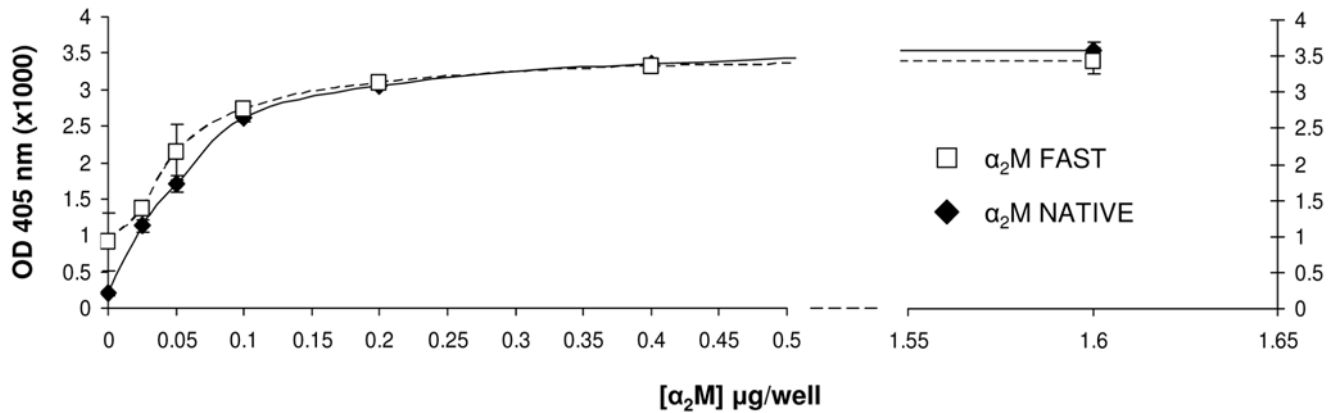

**Figure 6. Saturation curve for recDpl with increasing  $\alpha_2M$  concentrations.** The working range of coated- $\alpha_2M$  was from 25 ng to 1.6  $\mu\text{g}/\text{well}$ . recDpl was added 1.0  $\mu\text{g}/\text{well}$ . A trend of linearity is observed for values up to 100 ng/well, whereas a trend of plateau can be found for values higher than 400 ng/well. No difference is observed in the binding to recDpl comparing the native form with the activated form of  $\alpha_2M$ . y axis, OD values at 405 nm ( $\times 1,000$ ); x axis,  $\mu\text{g}$  of proteins per well; white squares,  $\alpha_2M$  "fast" form; black rhombi,  $\alpha_2M$  "native" form.  
doi:10.1371/journal.pone.0005968.g006

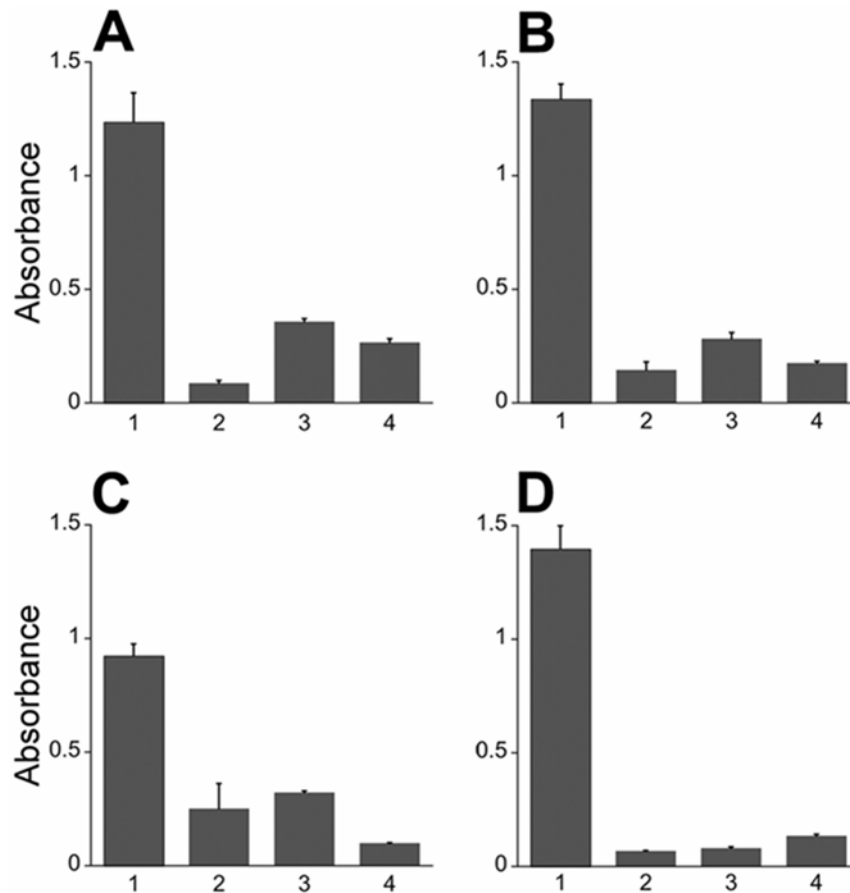

**Figure 7. recDpl and recPrP bind to each other.** To determine protein interaction, the primary protein was coated onto a 96-well plate then incubated with the secondary protein. After washing, the presence of the secondary protein was detected by ELISA (Column 1). Control experiments were performed without the primary protein (Column 2), secondary protein (Column 3), or primary antibody (Column 4). (A) Full-length recPrP(23–230) coated onto the plate with recDpl as the secondary protein. Dpl binding was detected using a rabbit polyclonal antibody to Dpl. (B–D) recDpl was coated onto ELISA plates and either recPrP(23–230) (B), recPrP(89–230) (C) or PrP-Fc (D) were incubated and measured for binding. PrP molecules were detected using either a rabbit polyclonal antibody to PrP (B, C) or with an anti-human Fc secondary antibody (D). All ELISA measurements were completed using an AP detection system at 405 nm. y axis, OD values at 405 nm ( $\times 1,000$ ). For all panels, graphs represent mean (bar) and standard deviation (error bar) from measurements of at least three independent experiments.  
doi:10.1371/journal.pone.0005968.g007



**Table 1.** Kinetics analysis of interaction between PrP and Dpl using SPR.

|                             | recPrP(89–230)                  | recPrP(23–230)                   |
|-----------------------------|---------------------------------|----------------------------------|
| $k_{on}$ ( $M^{-1}s^{-1}$ ) | $(8.4 \pm 0.02) \times 10^3$    | $(1.2 \pm 0.08) \times 10^5$     |
| $k_{off}$ ( $s^{-1}$ )      | $(8.7 \pm 0.12) \times 10^{-4}$ | $(1.3 \pm 0.034) \times 10^{-3}$ |
| $K_D$ (M)                   | $1.0 \times 10^{-7}$            | $1.1 \times 10^{-8}$             |

doi:10.1371/journal.pone.0005968.t001

protein(s) in the cerebellum, in order to better understand the role of Dpl in cerebellar neurodegeneration. By using Dpl-Fc as a tool to probe brain histoblots, we firstly identified a restricted expression of Dpl binding partners in the granule cells of either wild-type or PrP<sup>C</sup>-devoid mice [14]. Here, by combining IEF of rat cerebellar proteins and mass spectrometry analysis, we demonstrated for the first time the identification of rat  $\alpha_1I_3$  as Dpl interacting partner in the cerebellum. Rat  $\alpha_1I_3$  is a plasma proteinase inhibitor, which belongs to the superfamily of the alpha-macroglobulin proteins (Text S2). We then performed sequence homology analysis searches in order to find proteins

having high sequence homology with  $\alpha_1I_3$  not restrictedly expressed in rat. We identified human  $\alpha_2M$ , a member of the inhibitory macroglobulin family, and further confirmed the binding of  $\alpha_2M$  to Dpl as well.

The inhibitory capacity of the alpha-macroglobulins resides in their ability to entrap proteinase molecules and thereby hinder the access of high molecular weight substrates to the proteinase active site. This ability is thought to require at least two alpha-macroglobulin subunits, yet the monomeric alpha-macroglobulin rat  $\alpha_1I_3$  also inhibits proteinases [16]. Macroglobulins circulate in blood as an inactive precursor, which is activated by a proteinase after proteolytic attack on the so-called “bait region”. Subsequently, thiol ester bonds present in each  $\alpha_2M$  subunit are activated and generally the proteinase incorporates into the Glx residue exposed by these events. The covalent binding by the macroglobulin of the proteinase causes a conformational change in the former which is responsible for the electrophoretic shift of the activated form, thus referred to as “fast”, if compared to the inactive, “slow” form, or “native” form, of the macroglobulin. The activation of the macroglobulin can also be achieved *in vitro* by methylamine treatment. Activated forms of  $\alpha_2M$  are rapidly removed from the circulation by cellular receptors, main example of this is the low-density lipoprotein receptor-related protein

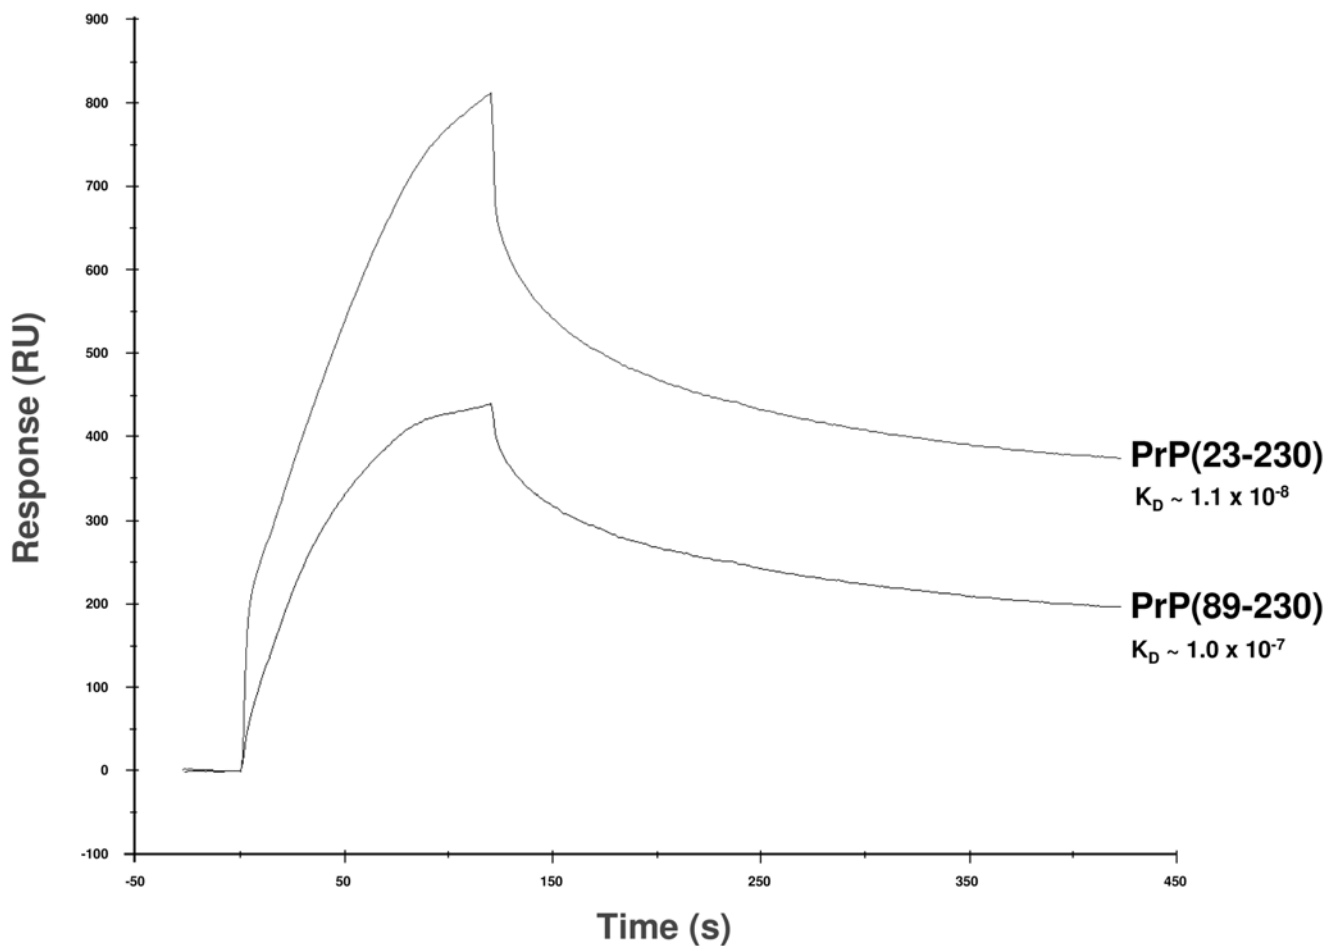

**Figure 8.** SPR sensorgram comparison of the kinetics of binding between Dpl with either recombinant full-length PrP (PrP(23–230)) or truncated PrP (PrP(89–230)). Equimolar amounts of PrP(23–230) and PrP(89–230) were injected over Dpl-coupled sensor chip, and kinetics of binding was monitored as response units (RU, y axis) on time (seconds, x axis). Full-length PrP(23–230) proved to possess higher binding capability for Dpl than truncated PrP(89–230). The sensorgrams in the figure were obtained with injection of 800 nM of both PrP(23–230) and PrP(89–230). doi:10.1371/journal.pone.0005968.g008

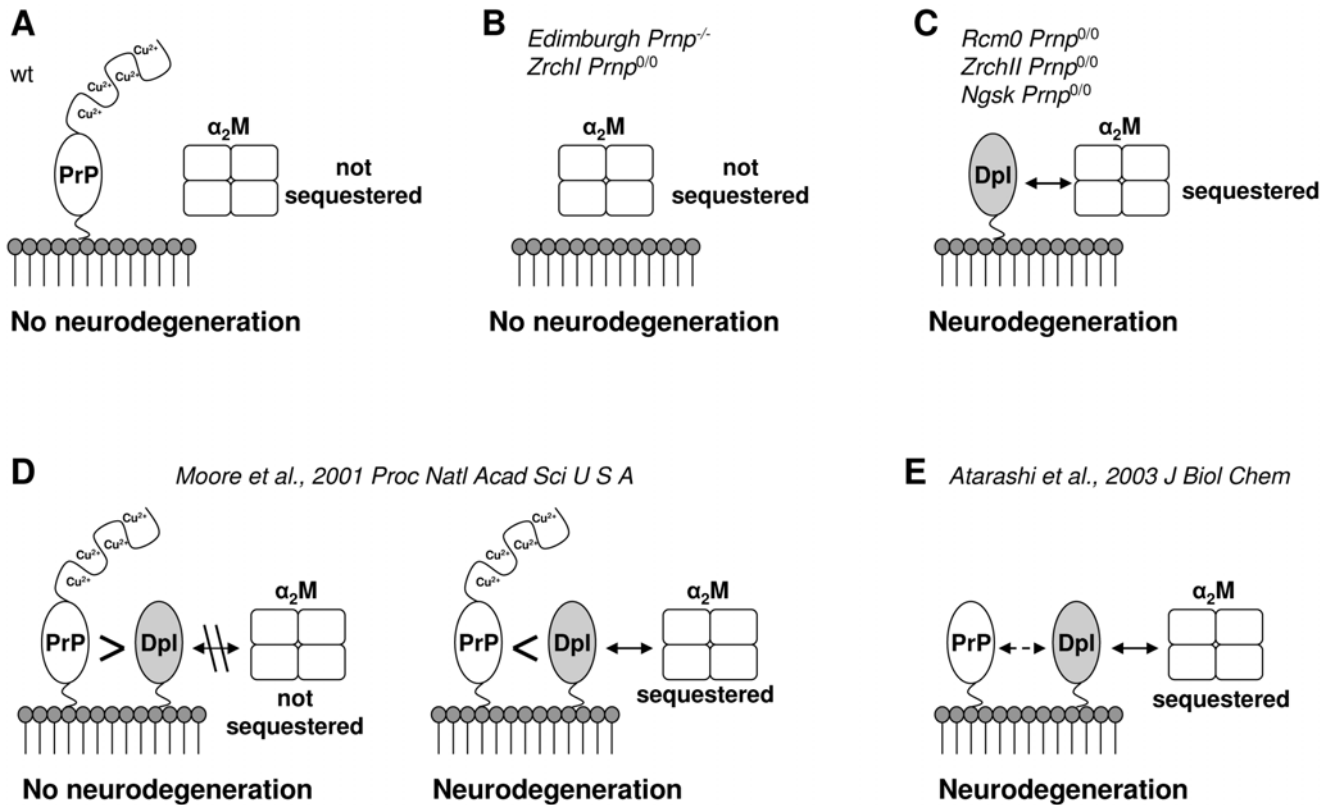

**Figure 9. Dpl-mediated model of cerebellar neurodegeneration.** The model bears on the postulations as follows: (A) PrP and  $\alpha_2M$  do not interact each other, therefore  $\alpha_2M$  is physiologically regulated in the cerebellum; (B) in *Prnp*<sup>0/0</sup> mice,  $\alpha_2M$  is still under physiological regulation as in wild type situation; (C) in absence of PrP and in simultaneous presence of Dpl,  $\alpha_2M$  is sequestered and deregulated, thus leading to cerebellar neurodegeneration. (D) PrP and Dpl are co-expressed, bind and antagonize each other depending on their stoichiometric ratio: on the left, PrP levels are higher than Dpl, PrP sequesters the entire amount of Dpl and thus prevents Dpl interaction with  $\alpha_2M$ ; on the right, Dpl expression is higher than PrP, and residual amounts of Dpl unbound to PrP are still capable of binding  $\alpha_2M$ . (E) N-terminally truncated PrP binds with less affinity to Dpl, thus permitting it to bind  $\alpha_2M$ . Mouse models are cited as follows: *Zrchl Prnp*<sup>0/0</sup> [53]; *Edinburgh Prnp*<sup>-/-</sup> [54]; *Rcm0 Prnp*<sup>0/0</sup> [3]; *Zrchll Prnp*<sup>0/0</sup> [55]; *Ngsk Prnp*<sup>0/0</sup> [6].

doi:10.1371/journal.pone.0005968.g009

(LRP), which recognizes the “fast” but not “slow” form of  $\alpha_2M$  [16].

recDpl proved to bind  $\alpha_2M$  with generally the same apparent affinity as for  $\alpha_1I_3$ . To explore whether the binding of Dpl to  $\alpha_1I_3$  and  $\alpha_2M$  could be discriminative between the inactive and the activated form of the proteins, binding assays were performed using the two distinct biological forms. However, apparently discordant data emerged in ELISA tests when using either recDpl as antigen, or when using Dpl-Fc. There was no significant difference in the binding of recDpl to both the inactive and the activated form of  $\alpha_1I_3$  and  $\alpha_2M$ , whereas Dpl-Fc showed a significant higher binding activity for the “fast” form of  $\alpha_1I_3$  in contrast to the “native” form. However, while recDpl is bacteria-produced in monomeric and unglycosylated form, Dpl-Fc is produced by transfection of eukaryotic N2a cells and is secreted in a dimeric and glycosylated form. Therefore, further investigations are needed to clarify whether there could be any significant difference in binding between Dpl and  $\alpha_1I_3$  and  $\alpha_2M$  *in vivo*.

Dpl shares common biochemical and structural features with PrP<sup>C</sup>, i.e. it is a GPI-anchored protein, can bind divalent copper ions, and folds in a PrP<sup>C</sup>-like tertiary structure [4,5]. Therefore, we tested whether PrP<sup>C</sup> would also interact with  $\alpha_1I_3$  and  $\alpha_2M$ , but this was not the case, as PrP<sup>C</sup> shows no binding signal when compared to Dpl (Figure 4 and Figure 5).

These results suggest that macroglobulins may not be common interacting partners both for PrP and Dpl. Differently from PrP<sup>C</sup>, Dpl is not physiologically detectable in the adult mouse brain, and the level of Dpl messenger RNA in the CNS is under strictly regulated developmental control [33]. Thus, we suggest that Dpl interaction with  $\alpha_1I_3$  and/or  $\alpha_2M$  may not be an usual physiological feature in the brain. However, this interaction might shed light on the role of Dpl on the cerebellar neurodegeneration occurring in tg mice lines, such as *Ngsk* and *Rcm0*, which ectopically overexpress Dpl in their CNS [3,6].

In light of our findings, we propose a novel possible mechanism where Dpl-induced cerebellar neurodegeneration may be due to withdrawal of natural inhibitor(s) of metalloproteinases, such as  $\alpha_1I_3$  and  $\alpha_2M$  (Figure 9). The absence of neuropathological signs in the cerebellum of both wild type (Figure 9A) and *Prnp*<sup>0/0</sup> *Zrchl* (Figure 9B) mice could be explained by a normal  $\alpha_2M$  activity not compromised by the ineffective binding to PrP. When Dpl is ectopically expressed in the CNS and PrP is simultaneously *knocked-out* (Figure 9C), Dpl binding to  $\alpha_2M$  triggers the cerebellar granule cells and Purkinje cells degeneration, finally leading to the pathological ataxic phenotype. When *Prnp*<sup>0/0</sup> tg mice ectopically expressing Dpl in their CNS are backcrossed with full length PrP-expressing mice, PrP co-expression rescues the ataxic phenotype (Figure 9D), and this rescue is protein concentration dependent

[8]. According to our results (Figure 7, Figure 8 and Tab. 1), full length PrP can bind Dpl with high affinity. Thus, when expressed at a higher level, PrP could sequester the total amount of Dpl, prevent Dpl binding to  $\alpha_2M$  and inhibit Dpl-induced neurodegeneration (Figure 9D, left). On the contrary, when Dpl levels exceed PrP expression, the remaining amount of Dpl unbound to PrP is still capable of binding to  $\alpha_2M$ , and thus can elicit neurodegeneration (Figure 9D, right).

Unlike full length PrP, N-terminally deleted PrP is incapable of rescuing Dpl-induced degeneration [34].

Additionally, we show here SPR data indicating that truncated PrP binds to Dpl with ten folds less affinity than full length PrP (Figure 8 and Table 1). According to our model, N-terminally truncated PrP binds Dpl with less efficacy than full length PrP, even if over expressed. In this case, Dpl retains its capability of binding to  $\alpha_2M$  and thus of triggering cerebellar degeneration (Figure 9E).

It cannot be ruled out that PrP and Dpl may also exert respectively protective and toxic functions on cerebellar neurons through distinct, non competitive, signaling pathways, and that the final cell fate might be the result of the sum of actions between separate pathways. This in turn could explain why PrP mutants like PrP $\Delta$ F show similar neurodegenerative phenotype in absence of Dpl.

However, the broad biological significance of the binding between Dpl and proteinases inhibitors needs to be further investigated. At every instance, our results are the first ones beginning to sort out a presumed physiological function of Dpl. Dpl binding to proteinase inhibitors, in fact, might normally occur in tissues with normal or higher level of Dpl expression, i.e. heart, skeletal muscle, spleen and above all testes [33]. Notably, mice devoid of Dpl are sterile. Their testes are macroscopically regular, and discordant data have been reported from different groups regarding motility and number of spermatozoa [35,36]. However, the major cause of sterility is due to an impairment of the spermatozoa in penetrating the egg's zona pellucida [35], thus suggesting an involvement of Dpl in correct spermatogenesis and sperm-egg interaction. Indeed, members of  $\alpha_2M$  family are found in the cytoplasm of Sertoli cells and in the tubular lumen and interstitial tissue in the testes [37], suggesting the fact the  $\alpha_2M$  could be a protective tool of the male reproductive system against acrosomal proteinases released during sperm maturation process. In addition,  $\alpha_2M$  family may play a role as a regulatory component of cytokines, growth factors, hormones and proteinases active during reproductive tissue remodeling and extracellular matrix restructuration [38].

Hence, the interaction between Dpl and  $\alpha_2M$  would be beneficial in testes where Dpl is physiologically highly expressed and its expression proves to be necessary for correct spermatozoa performance, while in the CNS, ectopic expression of Dpl in tg

mice, and possibly its interaction with  $\alpha_2M$ , is highly toxic to GCL and Purkinje neurons. Thus, the same biological mechanism could be beneficial in the male reproductive tissue while lethal in the CNS.

$\alpha_2M$  is a genetic risk factor for Alzheimer's disease (AD) [39,40,41,42]. Moreover,  $\alpha_2M$  was found to co-localize with beta-amyloid (A $\beta$ ) plaques in AD patients [43], and is supposed to mediate the internalization and the clearance of  $\alpha_2M$ -A $\beta$  complexes, possibly by interaction with one of its major neuronal receptors, the low-density lipoprotein receptor-related protein (LRP) [44,45,46,47,48]. Indeed, PrP internalization and trafficking is also mediated by LRP [49,50]. This finding raises the question whether a possible interaction of PrP<sup>C</sup> with LRP could have a key role in the conversion of PrP<sup>C</sup> into PrP<sup>Sc</sup>. Interestingly,  $\alpha_2M$  was found to facilitate, at least *in vitro*, PrP<sup>C</sup>-PrP<sup>Sc</sup> conversion [51]. In light of our findings, albeit  $\alpha_2M$  was not found to directly interact with PrP<sup>C</sup>, it cannot be ruled out that  $\alpha_2M$  activity could play a role also in prion diseases and other neurodegenerative disorders in addition to AD.

## Supporting Information

**Figure S1** MASCOT Search Result output. (A) List of the 29 peptides after MALDI-TOF MS analysis matching the query. (B) Primary aminoacid sequence of rat  $\alpha_1I_3$ . Matched peptides are shown in red bold.

Found at: doi:10.1371/journal.pone.0005968.s001 (4.13 MB TIF)

**Text S1** Recombinant mouse PrP and Dpl production and purification

Found at: doi:10.1371/journal.pone.0005968.s002 (0.03 MB DOC)

**Text S2** Sequence similarity of proteins belonging to  $\alpha_2M$  superfamily

Found at: doi:10.1371/journal.pone.0005968.s003 (0.19 MB DOC)

## Acknowledgments

The authors wish to thank Chongsuk Ryou for his help with initial SPR measurements and Roberto Furlan and Raffaella Fazio from San Raffaele Hospital, via Olgettina 48, 20132 Milan, Italy, for their help in the early stages of the project. The authors also wish to acknowledge Agata Kranjc's help for additional bioinformatics analysis. The authors wish to thank Gabriella Furlan and Diane Latawiec for English editing of the manuscript.

## Author Contributions

Conceived and designed the experiments: SB DF GL. Performed the experiments: SB DF JS AB EZ PT. Analyzed the data: SB DF JS AB PT CG SVP GL. Contributed reagents/materials/analysis tools: SB SVP GL. Wrote the paper: SB DF SVP GL.

## References

- Prusiner SB (1998) Prions (Les Prix Nobel Lecture). In: Frängsmyr T, ed (1998) Les Prix Nobel. Stockholm, Sweden: Almqvist & Wiksell International. pp 268–323.
- Prusiner SB (2001) Shattuck Lecture — Neurodegenerative diseases and prions. *N Engl J Med* 344: 1516–1526.
- Moore RC, Lee IY, Silverman GL, Harrison PM, Strome R, et al. (1999) Ataxia in prion protein (PrP)-deficient mice is associated with upregulation of the novel PrP-like protein doppel. *J Mol Biol* 292: 797–817.
- Silverman GL, Qin K, Moore RC, Yang Y, Mastrangelo P, et al. (2000) Doppel is an N-glycosylated, glycosylphosphatidylinositol-anchored protein. Expression in testis and ectopic production in the brains of Prnp(0/0) mice predisposed to Purkinje cell loss. *J Biol Chem* 275: 26834–26841.
- Mo H, Moore RC, Cohen FE, Westaway D, Prusiner SB, et al. (2001) Two different neurodegenerative diseases caused by proteins with similar structures. *Proc Natl Acad Sci U S A* 98: 2352–2357.
- Sakaguchi S, Katamine S, Nishida N, Moriuchi R, Shigematsu K, et al. (1996) Loss of cerebellar Purkinje cells in aged mice homozygous for a disrupted PrP gene. *Nature* 380: 528–531.
- Moore RC, Hope J, McBride PA, McConnell I, Selfridge J, et al. (1998) Mice with gene targeted prion protein alterations show that *Pmp*, *Sinc* and *Pmi* are congruent. *Nat Genet* 18: 118–125.
- Moore RC, Mastrangelo P, Bouzamondo E, Heinrich C, Legname G, et al. (2001) Doppel-induced cerebellar degeneration in transgenic mice. *Proc Natl Acad Sci U S A* 98: 15288–15293.
- Shmerling D, Hegyi I, Fischer M, Blattler T, Brandner S, et al. (1998) Expression of amino-terminally truncated PrP in the mouse leading to ataxia and specific cerebellar lesions. *Cell* 93: 203–214.
- Behrens A (2003) Physiological and pathological functions of the prion protein homologue Dpl. *Br Med Bull* 66: 35–42.

11. Chiarini LB, Freitas AR, Zanata SM, Brentani RR, Martins VR, et al. (2002) Cellular prion protein transduces neuroprotective signals. *EMBO J* 21: 3317–3326.
12. Chacon MA, Barria MI, Lorca R, Huidobro-Toro JP, Inestrosa NC (2003) A human prion protein peptide (PrP<sup>59–91</sup>) protects against copper neurotoxicity. *Mol Psychiatry* 8: 853–862, 835.
13. Lopes MH, Hajj GN, Muras AG, Mancini GL, Castro RM, et al. (2005) Interaction of cellular prion and stress-inducible protein 1 promotes neurogenesis and neuroprotection by distinct signaling pathways. *J Neurosci* 25: 11330–11339.
14. Legname G, Nelken P, Guan Z, Kanyo ZF, DeArmond SJ, et al. (2002) Prion and doppel proteins bind to granule cells of the cerebellum. *Proc Natl Acad Sci U S A* 99: 16285–16290.
15. Caughey B, Baron GS (2006) Prions and their partners in crime. *Nature* 443: 803–810.
16. Chu C, Pizzo S (1994) alpha 2-Macroglobulin, complement, and biologic defense: antigens, growth factors, microbial proteases, and receptor ligation. *Lab Invest* 71: 792–812.
17. Saravis C, O'Brien M, Zamcheck N (1979) Direct tissue isoelectric focusing in agarose. *J Immunol Methods* 29: 97–100.
18. Willoughby E, Lambert A (1983) A sensitive silver stain for proteins in agarose gels. *Anal Biochem* 130: 353–358.
19. Walker R, Keir G, Johnson M, Thompson E (1983) A rapid method for detecting oligoclonal IgG in unconcentrated CSF, by agarose isoelectric focusing, transfer to cellulose nitrate and immunoperoxidase staining. *J Neuroimmunol* 4: 141–148.
20. Shevchenko A, Wilm M, Vorm O, Mann M (1996) Mass spectrometric sequencing of proteins silver-stained polyacrylamide gels. *Anal Chem* 68: 850–858.
21. Perkins DN, Pappin DJ, Creasy DM, Cottrell JS (1999) Probability-based protein identification by searching sequence databases using mass spectrometry data. *Electrophoresis* 20: 3551–3567.
22. Altschul SF, Madden TL, Schäffer AA, Zhang Z, Miller W, et al. (1997) Gapped BLAST and PSI-BLAST: a new generation of protein database search programs. *Nucleic Acids Res* 25: 3389–3402.
23. Thompson J, Higgins D, Gibson T (1994) CLUSTAL W: improving the sensitivity of progressive multiple sequence alignment through sequence weighting, position-specific gap penalties and weight matrix choice. *Nucleic Acids Res* 22: 4673–4680.
24. Page R (1996) TreeView: an application to display phylogenetic trees on personal computers. *Comput Appl Biosci* 12: 357–358.
25. Imber M, Pizzo S (1981) Clearance and binding of two electrophoretic “fast” forms of human alpha 2-macroglobulin. *J Biol Chem* 256: 8134–8139.
26. Enghild J, Thøgersen I, Roche P, Pizzo S (1989) A conserved region in alpha-macroglobulins participates in binding to the mammalian alpha-macroglobulin receptor. *Biochemistry* 28: 1406–1412.
27. Harlow E, Lane D (1988) *Antibodies: A Laboratory Manual*. Cold Spring Harbor: Cold Spring Harbor Laboratory 726.
28. Perez D, Williamson RA, Kaneko K, Vergara J, Leclerc E, et al. (2001) Antibodies inhibit prion propagation and clear cell cultures of prion infectivity. *Nature* 412: 739–743.
29. Serban D, Taraboulos A, DeArmond SJ, Prusiner SB (1990) Rapid detection of Creutzfeldt-Jakob disease and scrapie prion proteins. *Neurology* 40: 110–117.
30. Ryou C, Prusiner SB, Legname G (2003) Cooperative binding of dominant-negative prion protein to kringle domains. *J Mol Biol* 329: 323–333.
31. Geiger T, Lamri Y, Tran-Thi T, Gauthier F, Feldmann G, et al. (1987) Biosynthesis and regulation of rat alpha 1-inhibitor3, a negative acute-phase reactant of the macroglobulin family. *Biochem J* 245: 493–500.
32. Sottrup-Jensen L, Sand O, Kristensen L, Fey G (1989) The alpha-macroglobulin bait region. Sequence diversity and localization of cleavage sites for proteinases in five mammalian alpha-macroglobulins. *J Biol Chem* 264: 15781–15789.
33. Li A, Sakaguchi S, Shigematsu K, Atarashi R, Roy BC, et al. (2000) Physiological expression of the gene for PrP-like protein, PrPLP/Dpl, by brain endothelial cells and its ectopic expression in neurons of PrP-deficient mice ataxic due to Purkinje cell degeneration. *Am J Pathol* 157: 1447–1452.
34. Atarashi R, Nishida N, Shigematsu K, Goto S, Kondo T, et al. (2003) Deletion of N-terminal residues 23–88 from prion protein (PrP) abrogates the potential to rescue PrP-deficient mice from PrP-like protein/doppel-induced Neurodegeneration. *J Biol Chem* 278: 28944–28949.
35. Behrens A, Genoud N, Naumann H, Rulicke T, Janett F, et al. (2002) Absence of the prion protein homologue Doppel causes male sterility. *EMBO J* 21: 3652–3658.
36. Paisley D, Banks S, Selfridge J, McLennan NF, Ritchie AM, et al. (2004) Male infertility and DNA damage in Doppel knockout and prion protein/Doppel double-knockout mice. *Am J Pathol* 164: 2279–2288.
37. Zhu L, Cheng C, Phillips D, Bardin C (1994) The immunohistochemical localization of alpha 2-macroglobulin in rat testes is consistent with its role in germ cell movement and spermiation. *J Androl* 15: 575–582.
38. Wong C, Mruk D, Siu M, Cheng C (2005) Blood-testis barrier dynamics are regulated by {alpha}2-macroglobulin via the c-Jun N-terminal protein kinase pathway. *Endocrinology* 146: 1893–1908.
39. Blacker D, Wilcox MA, Laird NM, Rodes L, Horvath SM, et al. (1998) Alpha-2 macroglobulin is genetically associated with Alzheimer disease. *Nat Genet* 19: 357–360.
40. Liao A, Nitsch RM, Greenberg SM, Finckh U, Blacker D, et al. (1998) Genetic association of an alpha2-macroglobulin (Val1000Ile) polymorphism and Alzheimer's disease. *Hum Mol Genet* 7: 1953–1956.
41. Dodel RC, Du Y, Bales KR, Gao F, Eastwood B, et al. (2000) Alpha2 macroglobulin and the risk of Alzheimer's disease. *Neurology* 54: 438–442.
42. Saunders AJ, Tanzi RE (2003) Welcome to the complex disease world Alpha2-macroglobulin and Alzheimer's disease. *Experimental Neurology* 184: 50–53.
43. Strauss S, Bauer J, Ganter U, Jonas U, Berger M, et al. (1992) Detection of interleukin-6 and alpha 2-macroglobulin immunoreactivity in cortex and hippocampus of Alzheimer's disease patients. *Lab Invest* 66: 223–230.
44. Hyman BT, Strickland DK, Rebeck GW (1994) Alpha 2-macroglobulin receptor/low density lipoprotein receptor-related protein. Relationship to apolipoprotein E and role in Alzheimer disease senile plaques. *Ann N Y Acad Sci* 737: 88–95.
45. Rebeck GW, Harr SD, Strickland DK, Hyman BT (1995) Multiple, diverse senile plaque-associated proteins are ligands of an apolipoprotein E receptor, the alpha 2-macroglobulin receptor/low-density-lipoprotein receptor-related protein. *Ann Neurol* 37: 211–217.
46. Kounnas MZ, Moir RD, Rebeck GW, Bush AI, Argraves WS, et al. (1995) LDL receptor-related protein, a multifunctional ApoE receptor, binds secreted beta-amyloid precursor protein and mediates its degradation. *Cell* 82: 331–340.
47. Narita M, Holtzman DM, Schwartz AL, Bu G (1997) Alpha2-macroglobulin complexes with and mediates the endocytosis of beta-amyloid peptide via cell surface low-density lipoprotein receptor-related protein. *J Neurochem* 69: 1904–1911.
48. Hyman BT, Strickland D, Rebeck GW (2000) Role of the low-density lipoprotein receptor-related protein in beta-amyloid metabolism and Alzheimer disease. *Arch Neurol* 57: 646–650.
49. Taylor DR, Hooper NM (2007) The low-density lipoprotein receptor-related protein 1 (LRP1) mediates the endocytosis of the cellular prion protein. *Biochem J* 402: 17–23.
50. Parkyn CJ, Vermeulen EG, Mootoosamy RC, Sunyach C, Jacobsen C, et al. (2008) LRP1 controls biosynthetic and endocytic trafficking of neuronal prion protein. *J Cell Sci* 121: 773–783.
51. Adler V, Davidowitz E, Tamburi P, Rojas P, Grossman A (2007) Alpha2-macroglobulin is a potential facilitator of prion protein transformation. *Amyloid* 14: 1–10.
52. Watts JC, Westaway D (2007) The prion protein family: diversity, rivalry, and dysfunction. *Biochim Biophys Acta* 1772: 654–672.
53. Büeler H, Fischer M, Lang Y, Bluethmann H, Lipp H-P, et al. (1992) Normal development and behaviour of mice lacking the neuronal cell-surface PrP protein. *Nature* 356: 577–582.
54. Manson JC, Clarke AR, Hooper ML, Aitchison L, McConnell I, et al. (1994) 129/Ola mice carrying a null mutation in PrP that abolishes mRNA production are developmentally normal. *Mol Neurobiol* 8: 121–127.
55. Rossi D, Cozzio A, Flechsig E, Klein MA, Rulicke T, et al. (2001) Onset of ataxia and Purkinje cell loss in PrP null mice inversely correlated with Dpl level in brain. *EMBO J* 20: 694–702.
